# Supplementary material for: Evolution of Apathy in Early Parkinson's Disease: A 4-Years Prospective Cohort Study
Source: PubMed Central journal article supplement (PMC7901914; doi:10.3389/fnagi.2020.620762), 2021-01-28
Supplement: Image_1.pdf [file Image_1.pdf]

Global Schoenfeld Test p: 0.09359

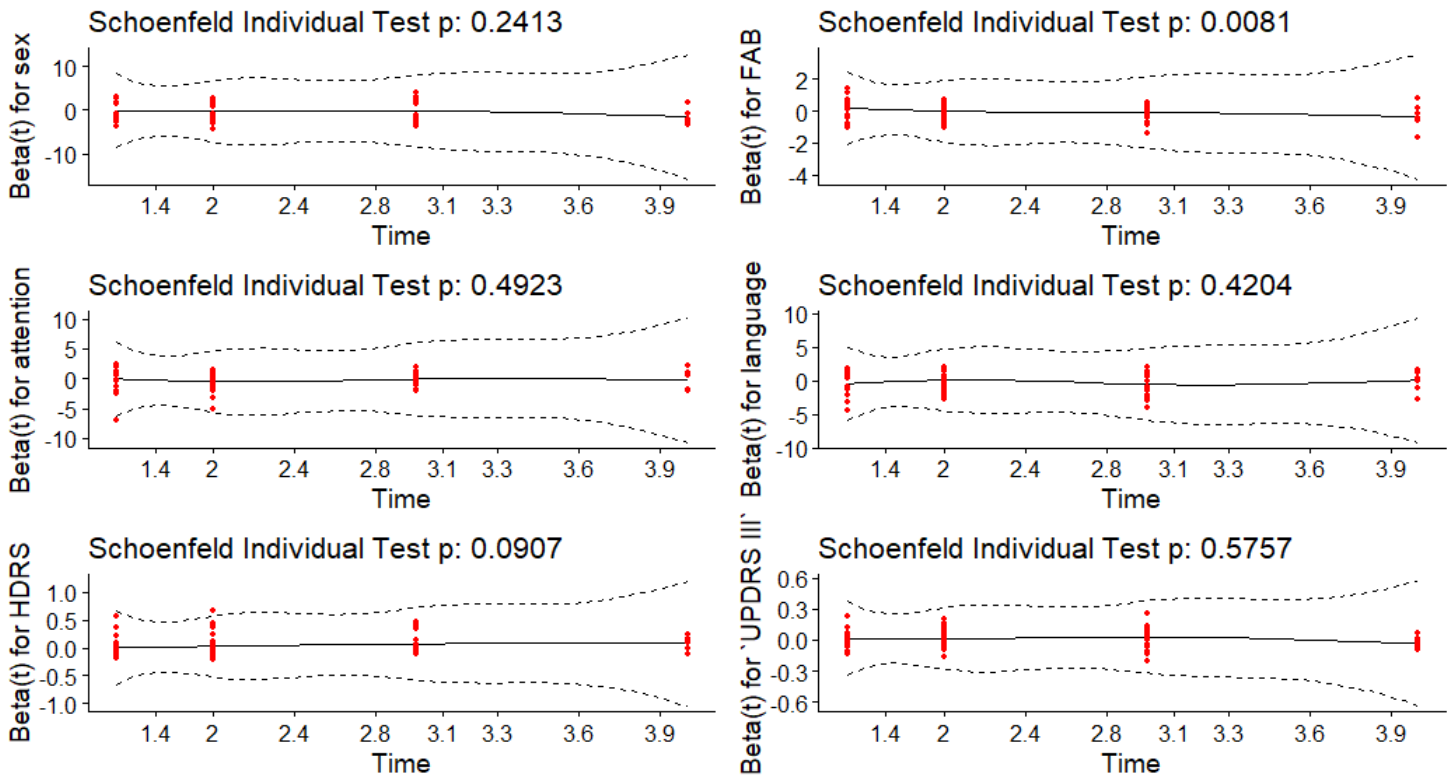

**Supplementary Figure 1 Test for the proportional hazard assumption for Cox model**

The Schoenfeld individual test indicated that the Schoenfeld had no significant relationship with time ( $P = 0.094$ ), suggesting that the Cox model met the proportional hazard assumption.
